# Supplementary material for: DigChem: Identification of disease-gene-chemical relationships from Medline abstracts
Source: PLOS journal article supplement (doi:10.1371/journal.pcbi.1007022), 2019-05-15

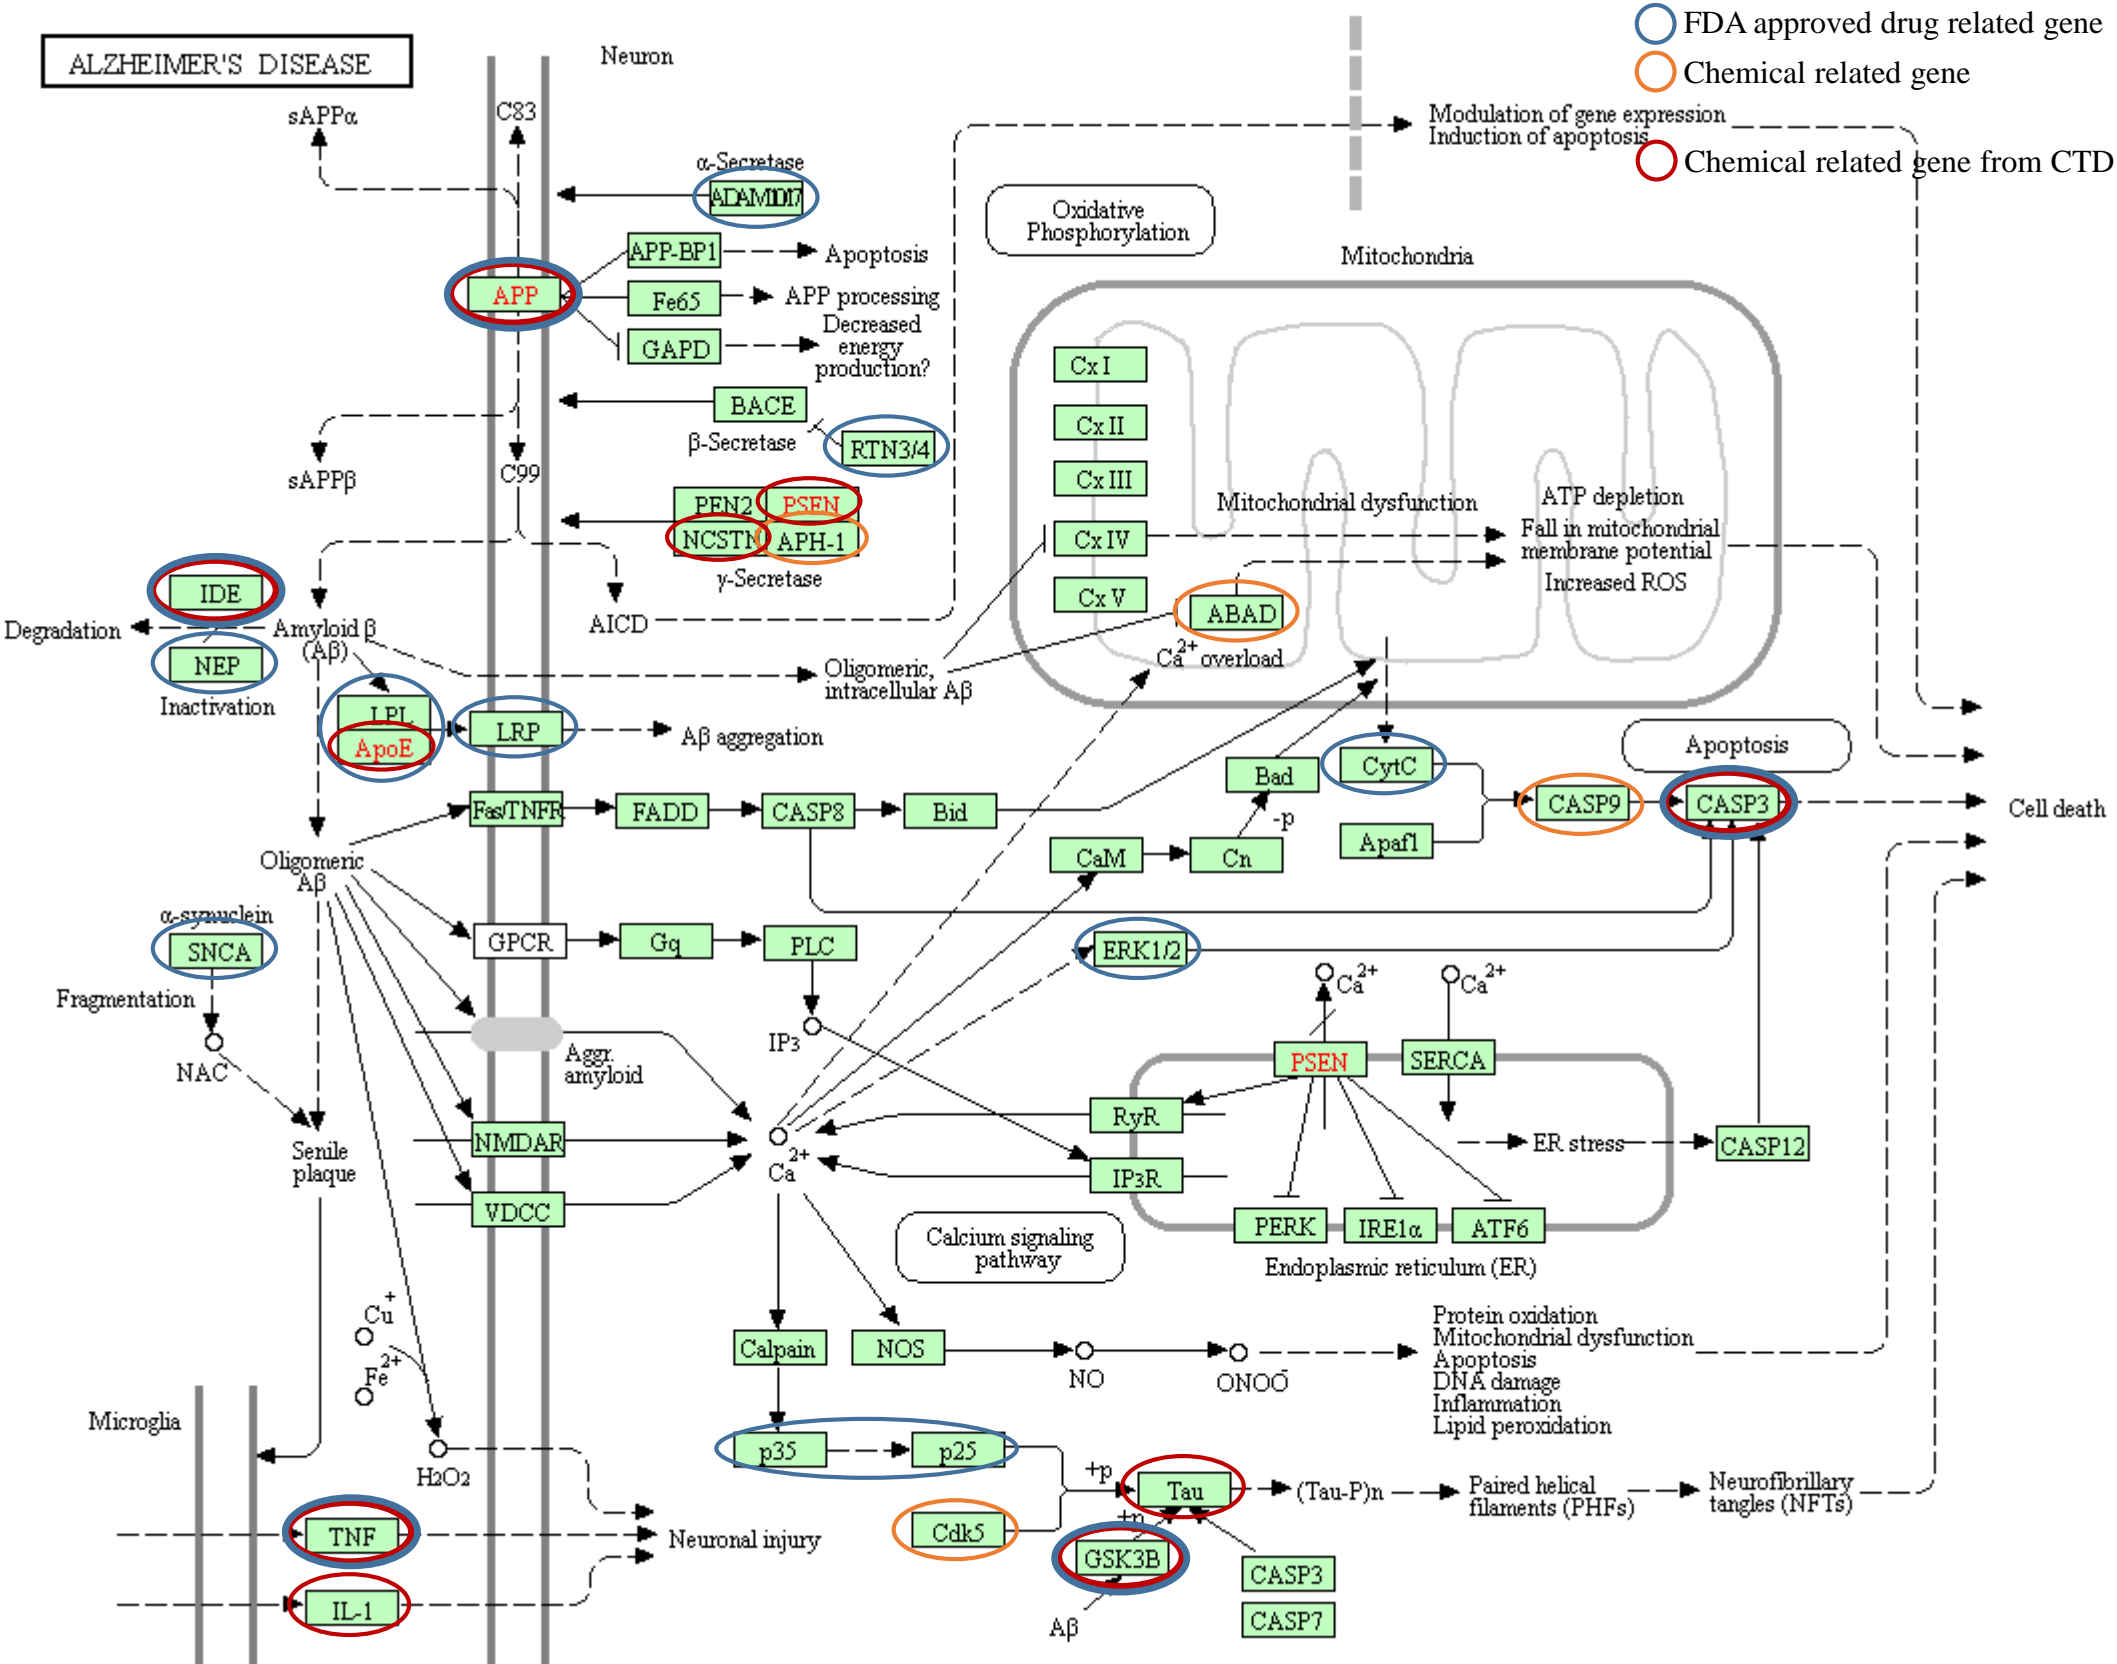

Supplement: S2 (10.1371/journal.pcbi.1007022.s002) [file journal.pcbi.1007022.s002]
