# Supplementary material for: DigChem: Identification of disease-gene-chemical relationships from Medline abstracts
Source: PLoS Comput Biol. 2019 May 15;15(5):e1007022. doi: 10.1371/journal.pcbi.1007022 (PMC6519793; doi:10.1371/journal.pcbi.1007022)
Supplement: S3 Table — (XLSX) [file pcbi.1007022.s005.xlsx]

## Sheet: Sheet1
Supplementary Table 3. Performance of hyper-parameter tuning. Tested hyperparameters are total four options; number of hidden units of LSTM units, the learning rate, the size of the fully connected layer, and the size of minibatches. We tested hyperparameters based on following parameters; Number of hidden units of LSTM units = 100, The learning rate = 0.95, The size of the fully connected layer …
Number of hidden units of LSTM units
Number of hidden units	F-score	Accuracy
50	0.749	0.737
55	0.75	0.728
60	0.752	0.74
65	0.749	0.735
70	0.745	0.729
75	0.748	0.736
80	0.75	0.731
85	0.745	0.729
90	0.743	0.732
95	0.745	0.733
100	0.754	0.735
The learning rate
The learning rate	F-score	Accuracy
0.5	0.744	0.728
0.55	0.749	0.735
0.6	0.745	0.731
0.65	0.746	0.731
0.7	0.747	0.733
0.75	0.746	0.731
0.8	0.747	0.735
0.85	0.739	0.728
0.9	0.751	0.733
0.95	0.754	0.735
0.99	0.747	0.735
The size of the fully connected layer
Size	F-score	AUC
100	0.735	0.724
200	0.754	0.735
300	0.757	0.743
400	0.76	0.74
500	0.756	0.739
600	0.759	0.742
700	0.755	0.741
800	0.755	0.741
900	0.752	0.737
1000	0.764	0.746
The size of minibatches
Size	F-score	AUC
10	0.761	0.745
16	0.757	0.746
20	0.75	0.736
25	0.755	0.74
32	0.755	0.738
40	0.751	0.739
50	0.754	0.735
64	0.751	0.733
80	0.741	0.733
100	0.75	0.733
160	0.746	0.733
200	0.746	0.735
320	0.73	0.719
400	0.735	0.726
800	0.749	0.732
